# Supplementary material for: New automated analysis to monitor neutrophil function point-of-care in the intensive care unit after trauma
Source: PubMed Central journal article supplement (PMC7072076; doi:10.1186/s40635-020-0299-1), 2020-03-14

**a**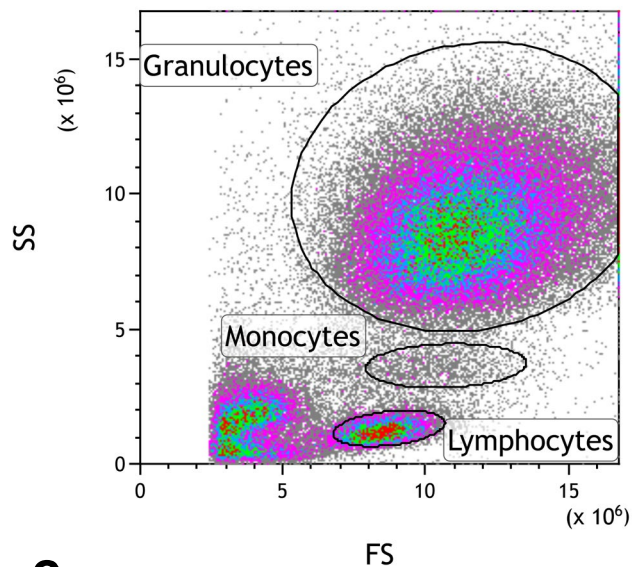**b**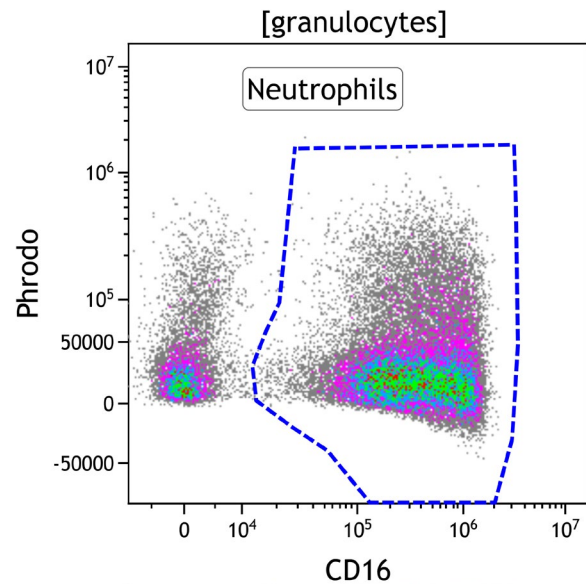**c**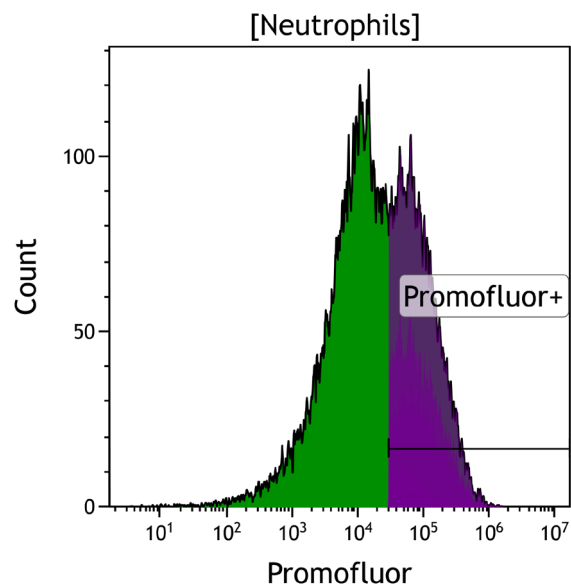**d**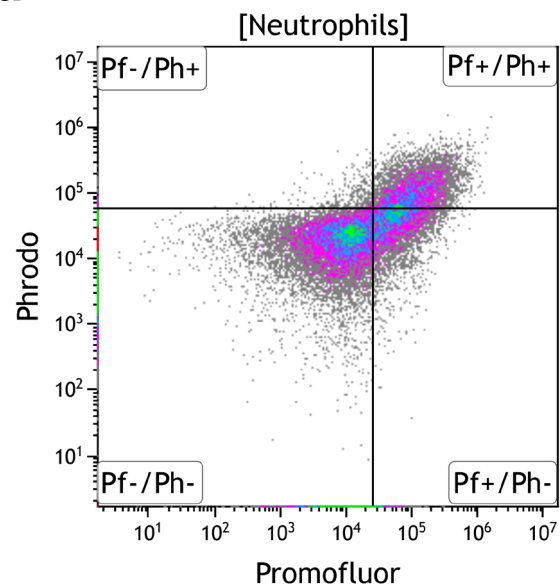

Supplement: 40635_2020_299_MOESM1_ESM.pdf [file 40635_2020_299_MOESM1_ESM.pdf]
