# Supplementary material for: New automated analysis to monitor neutrophil function point-of-care in the intensive care unit after trauma
Source: PubMed Central journal article supplement (PMC7072076; doi:10.1186/s40635-020-0299-1), 2020-03-14
Supplement: 40635_2020_299_MOESM3_ESM.pdf [file 40635_2020_299_MOESM3_ESM.pdf]

|        | Acidification <12 h     | Acidification day 3    | Acidification day 6     | Acidification day 10    | Acidification day 15    |
|--------|-------------------------|------------------------|-------------------------|-------------------------|-------------------------|
| Age    | $r = -0.516, p = 0.059$ | $r = 0.042, p = 0.887$ | $r = -0.130, p = 0.659$ | $r = -0.346, p = 0.247$ | $r = -0.383, p = 0.308$ |
| Gender | $U = 8.0, p = 0.106$    | $U = 18.0, p = 0.606$  | $U = 18.0, p = 0.839$   | $U = 18.0, p = 1.000$   | $U = 6.0, p = 0.889$    |
| ISS    | $r = -0.102, p = 0.729$ | $r = 0.269, p = 0.325$ | $r = 0.219, p = 0.452$  | $r = 0.083, p = 0.788$  | $r = -0.370, p = 0.327$ |
| RBCs   | $r = -0.016, p = 0.957$ | $r = 0.436, p = 0.119$ | $r = 0.029, p = 0.921$  | $r = -0.095, p = 0.758$ | $r = -0.443, p = 0.233$ |
| FFP    | $r = 0.258, p = 0.372$  | $r = 0.400, p = 0.156$ | $r = 0.236, p = 0.417$  | $r = -0.119, p = 0.699$ | $r = -0.070, p = 0.859$ |
| PLTs   | $r = 0.220, p = 0.449$  | $r = 0.390, p = 0.168$ | $r = -0.074, p = 0.801$ | $r = -0.228, p = 0.453$ | $r = -0.183, p = 0.638$ |

ISS = Injury Severity Score. FFP = fresh frozen plasma. RBCs = packed red blood cells. PLTs = platelets.
